# Supplementary material for: Large-area grown ultrathin molybdenum oxides for label-free sensitive biomarker detection
Source: Royal Society of Chemistry journal article supplement (doi:10.1039/d4nr01275e), 2024-01-01
Supplement: d4nr01275e1.pdf [file d4nr01275e1.pdf]

## Supporting Information

### Large-area grown ultrathin molybdenum oxide for label-free sensitive biomarker detection

Jiaru Zhang,<sup>a</sup> Yange Luan,<sup>a</sup> Qijie Ma,<sup>a</sup> Yihong Hu,<sup>a</sup> Rui Ou,<sup>a</sup> Crispin Szydzik,<sup>a</sup> Yunyi Yang,<sup>b</sup> Vien Trinh,<sup>a</sup> Nam Ha,<sup>a</sup> Zhenyue Zhang,<sup>a</sup> Guanghui Ren,<sup>a</sup> Hu Jun Jia,<sup>c</sup> Bao Yue Zhang<sup>\*a,d</sup>, and Jian Zhen Ou<sup>\*a</sup>

<sup>a</sup>School of Engineering, RMIT University, Melbourne 3000, Australia

<sup>b</sup>School of Science, Computing and Engineering Technologies, Swinburne University of Technology, Hawthorn, Victoria 3122, Australia

<sup>c</sup>College of Microelectronics, Xidian University, Xi'an, Shaanxi, 710000, China

<sup>d</sup>School of Physics and Astronomy, Monash University, Clayton, Victoria, 3800 Australia

Corresponding Author

\* Email: baoyue.zhang@rmit.edu.au (B.Y.Z.)

\* Email: jianzhen.ou@rmit.edu.au (J.Z.O.)

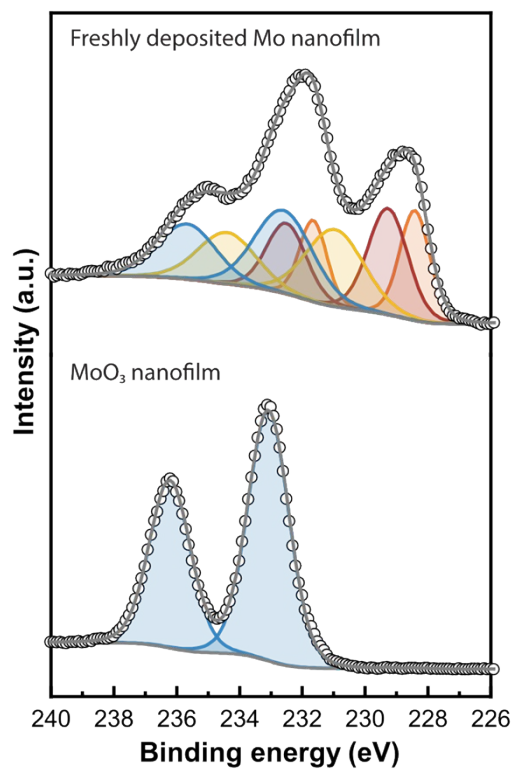

**Figure S1.** The XPS spectra of freshly deposited ultrathin Mo film (top) and MoO<sub>3</sub> nanofilm after oxidation process (bottom). The fitted molybdenum metal peaks (228.4 eV and 231.6 eV), Mo<sup>4+</sup> peaks (229.2 eV and 232.4 eV), Mo<sup>5+</sup> peaks (231.0 eV and 234.2 eV), and Mo<sup>6+</sup> peaks (232.7 eV and 235.8 eV) are indicated in the graph.

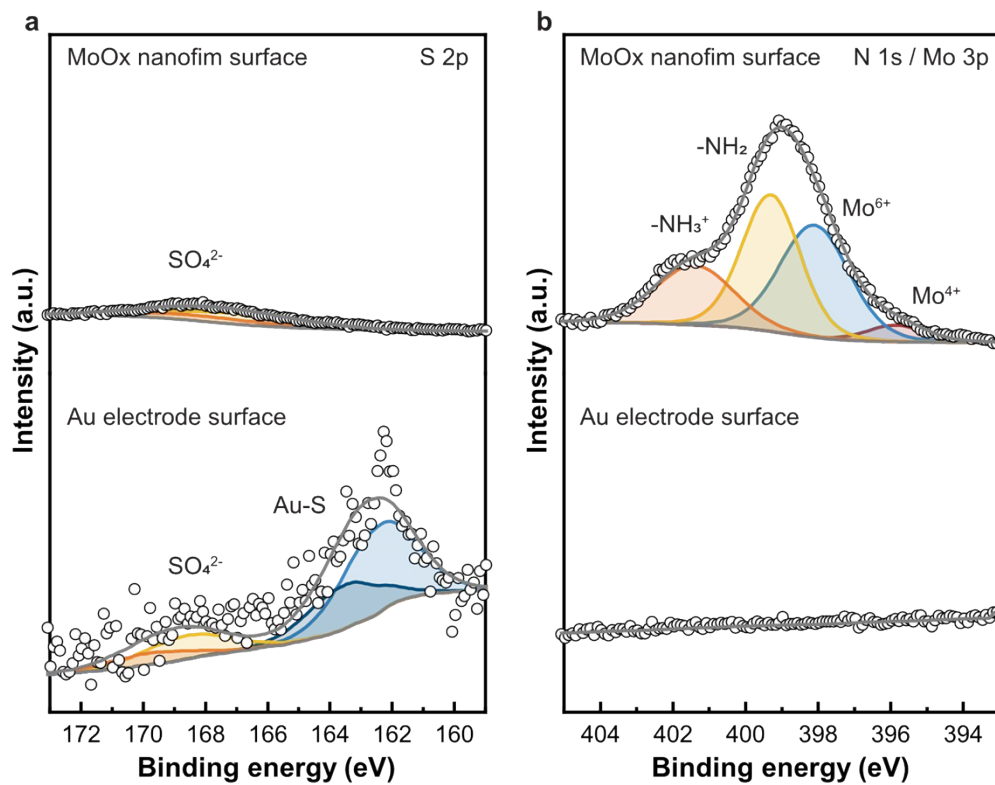

**Figure S2.** Comparison of high resolution XPS spectra of MoO<sub>x</sub> nanofilm surface (top) and Au electrode surface (bottom) after functionalization with APTES for (a) N 1s; (b) S 2p. The low signal-to-noise ratio of S2p is due to the dual factors of sole S atom in each 1-Dodecanethiol molecule<sup>1</sup> and low concentration (10 mM) of 1-Dodecanethiol molecule incubated in ethanol solution [1, 2].

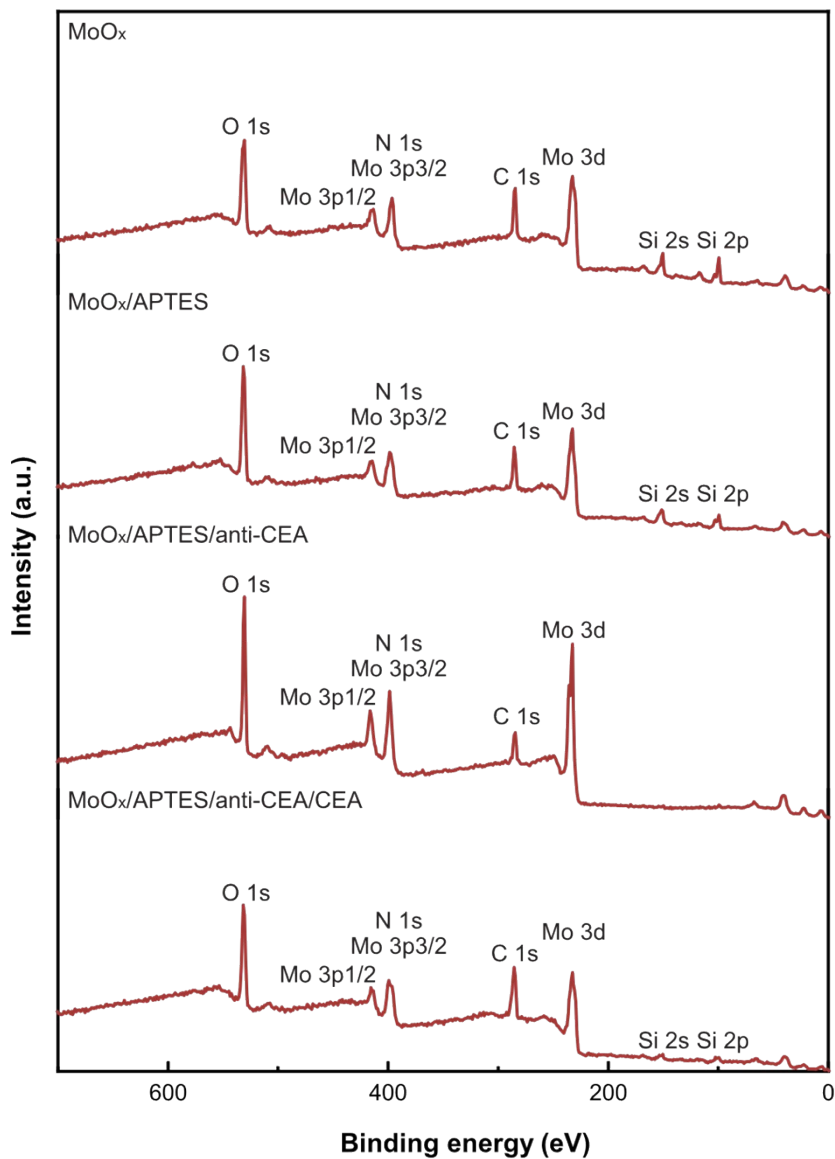

**Figure S3.** XPS survey for MoO<sub>x</sub>, MoO<sub>x</sub>/APTES, MoO<sub>x</sub>/APTES/anti-CEA, and MoO<sub>x</sub>/APTES/anti-CEA/CEA.

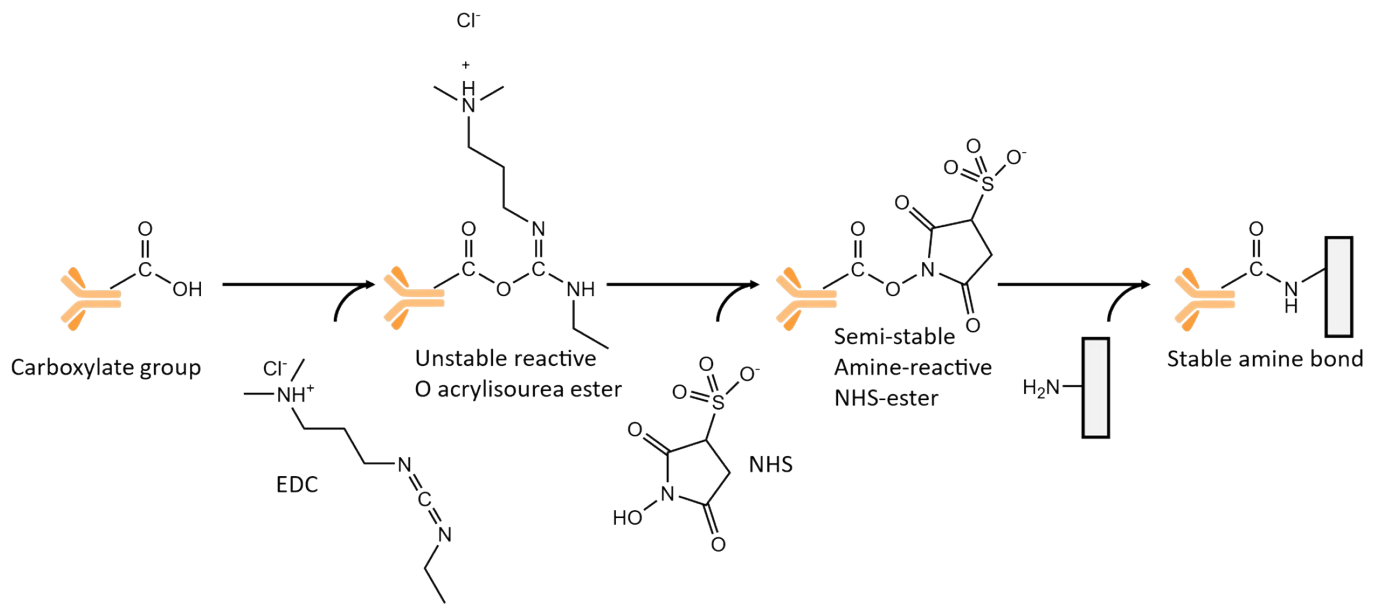

**Figure S4.** Immobilization of anti-CEA on an amine group functionalized surface mediated by EDC and NHS coupling.

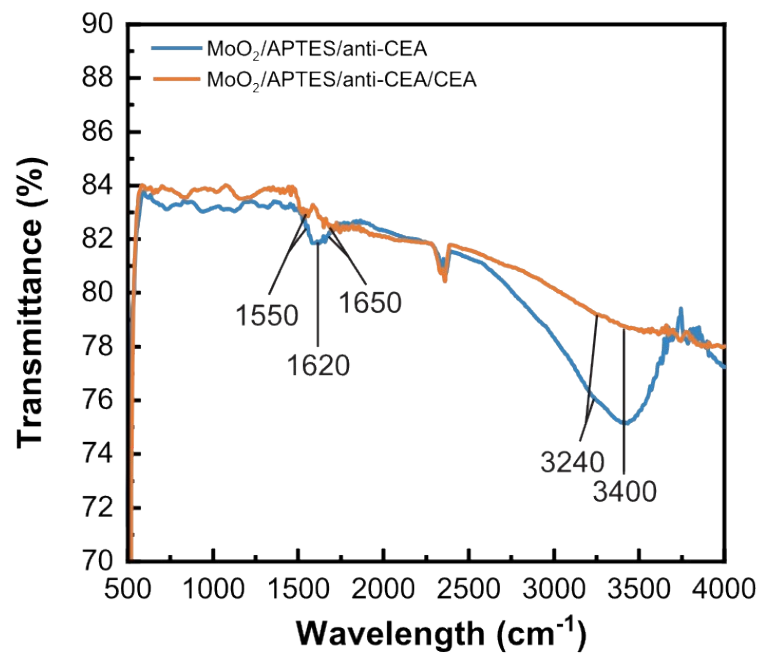

Figure S5. FTIR spectra of MoO<sub>x</sub>/APTES/anti-CEA, and MoO<sub>x</sub>/APTES/anti-CEA/CEA.

**Table S1.** Detailed composition of ultrathin MoO<sub>x</sub> film in different functionalization stage calculated from the XPS

|                      | Ref   | MoO <sub>x</sub> /APTES | MoO <sub>x</sub> /APTES/anti-CEA | MoO <sub>x</sub> /APTES/anti-CEA/CEA |
|----------------------|-------|-------------------------|----------------------------------|--------------------------------------|
| Mo <sup>6+</sup> [%] | 16.55 | 25.83                   | 12.94                            | 11.01                                |
| Mo <sup>5+</sup> [%] | 28.64 | 21.77                   | 24.55                            | 25.12                                |
| Mo <sup>4+</sup> [%] | 54.80 | 52.4                    | 62.52                            | 63.87                                |
| x                    | 2.31  | 2.37                    | 2.25                             | 2.24                                 |

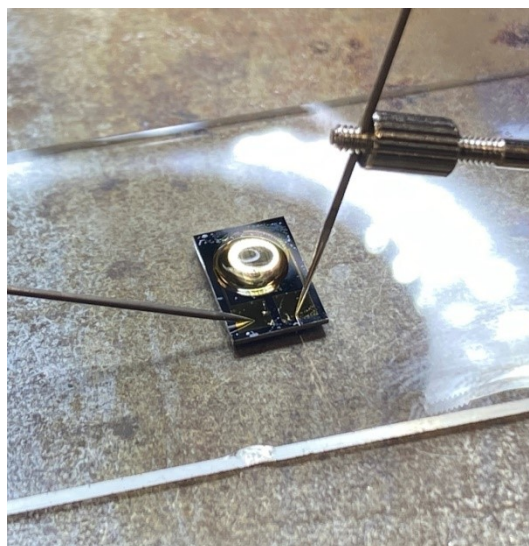

**Figure S6.** Electrical measurements on the developed  $\text{MoO}_x$ -IDE biosensing chip with output characteristic at a fixed 0.1 V source voltage.



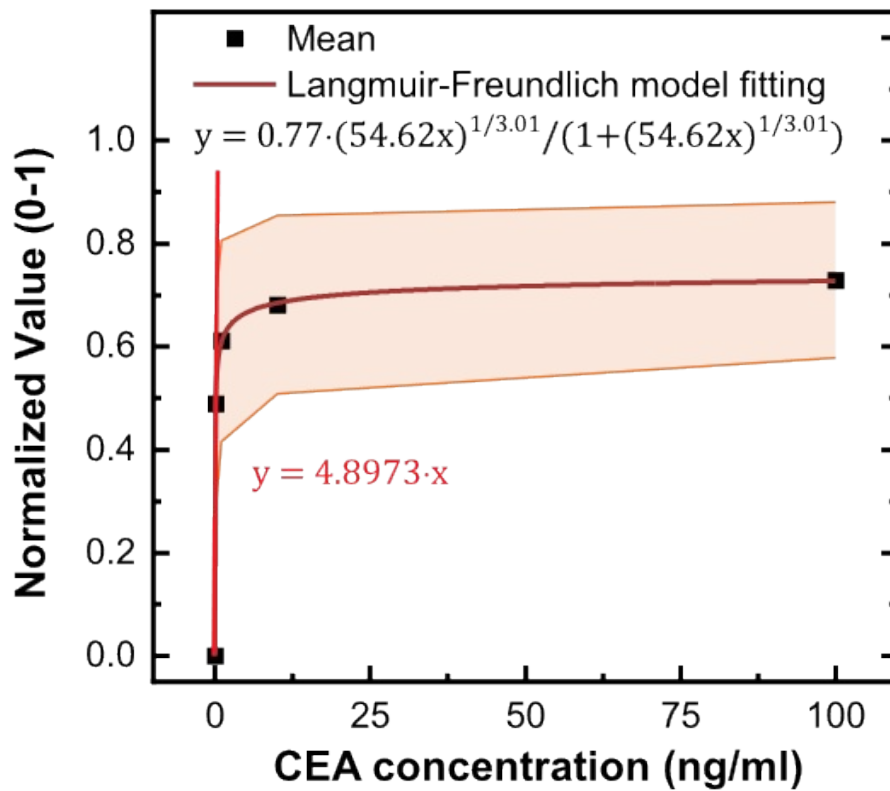

Figure S7. the slope of the linear region of the Langmuir-Freundlich model fitted curve.

**Table S2.** Comparisons of the sensing performance of developed electronic biosensing chip with other methods for the detection of CEA biomarker.

| Device                                        | Detection Type | Linear range (ng/ mL) | Detection limit (ng/ mL) | Reference |
|-----------------------------------------------|----------------|-----------------------|--------------------------|-----------|
| anti-CEA/ADA-COOH/APTES/SiO <sub>2</sub> /IDE | Labeled        | 0.1 - 1000            | 0.007                    | [3]       |
| Si <sub>3</sub> N <sub>4</sub> /Au/IDE        | Label-free     | 0.0001 - 10           | 0.0001                   | [4]       |
| anti-CEA/PRY-NHS/Graphene/FET                 | Label-free     | 0.1 - 100             | 0.1                      | [5]       |
| anti-CEA/denatured-BSA/Graphene/FET           | Labeled        | 0.01 - 100            | 0.00034                  | [6]       |
| anti-CEA/MoS <sub>2</sub> -Au/GCE             | Labeled        | 0.001 - 50            | 0.00027                  | [7]       |
| Anti-CEA/APTES/MoO <sub>x</sub> /IDE          | Label-free     | 0.1-100               | 0.015                    | This work |

## Reference

1. Sigma-Aldrich. "1-Dodecanethiol." <https://www.sigmaaldrich.com/AU/en/product/aldrich/471364> (accessed 04-05, 2024).
2. N. Mahmoodi et al., "Room temperature thermally evaporated thin Au film on Si suitable for application of thiol self-assembled monolayers in micro/nano-electro-mechanical-systems sensors," *Journal of Vacuum Science & Technology A*, vol. 35, no. 4, 2017.
3. Li, X., Yu, M., Chen, Z., Lin, X., and Wu, Q., A sensor for detection of carcinoembryonic antigen based on the polyaniline-Au nanoparticles and gap-based interdigitated electrode. *Sens. Actuators, B*, 2017, 239, 874-882.
4. Jin, Y., Mao, H., Jin, Q., and Zhao, J., Real-time determination of carcinoembryonic antigen by using a contactless electrochemical immunosensor. *Analytical Methods*, 2016, 8(24), 4861-4866.
5. Zhou, L., Mao, H., Wu, C., Tang, L., Wu, Z., Sun, H., Zhang, H., Zhou, H., Jia, C., and Jin, Q., Label-free graphene biosensor targeting cancer molecules based on non-covalent modification. *Biosensors and Bioelectronics*, 2017, 87, 701-707.
6. Zhou, L., Wang, K., Sun, H., Zhao, S., Chen, X., Qian, D., Mao, H., and Zhao, J., Novel graphene biosensor based on the functionalization of multifunctional nano-bovine serum albumin for the highly sensitive detection of cancer biomarkers. *Nano-micro letters*, 2019, 11(1), 1-13.
7. Wang, X., Chu, C., Shen, L., Deng, W., Yan, M., Ge, S., Yu, J., and Song, X., An ultrasensitive electrochemical immunosensor based on the catalytical activity of MoS<sub>2</sub>-Au composite using Ag nanospheres as labels. *Sens. Actuators, B*, 2015, 206, 30-36.
